1 Biological Sciences

2

3

4

5

6 Cell-wall synthesis and ribosome maturation are co-  
7 regulated by an RNA switch in *Mycobacterium*  
8 *tuberculosis*

9

10

11 Short title: Regulation of cell wall and ribosomes by RNA switch

12

13 Stefan Schwenk<sup>a</sup>, Alexandra Moores<sup>a</sup>, Irene Nobeli<sup>b</sup>, Timothy D.  
14 McHugh<sup>c</sup>, Kristine B. Arnvig<sup>a,1</sup>

15

16

17

18

19

20 <sup>a</sup>Institute for Structural and Molecular Biology, University College London; <sup>b</sup>Institute for  
21 Structural and Molecular Biology, Birkbeck; <sup>c</sup>Centre for Clinical Microbiology, Royal Free  
22 Campus, University College London, London

23

24

25 <sup>1</sup>Corresponding author: k.arnvig@ucl.ac.uk

26

27

## 28 **Abstract**

29 The success of *Mycobacterium tuberculosis* as a pathogen relies on the ability to switch  
30 between active growth and non-replicating persistence, associated with latent TB infection.  
31 Resuscitation promoting factors (Rpf) are essential for the transition of *M. tuberculosis* to  
32 dormancy and for emergence from the non-replicating persistent state. But these enzymes  
33 are double-edged swords, as their ability to degrade the cell wall, is potentially lethal to the  
34 bacterium itself. Hence, Rpf expression is tightly regulated. We have identified a novel  
35 regulatory element in the 5' untranslated region (UTR) of *rpfB*. We demonstrate that this  
36 element is a transcriptionally regulated RNA switch/riboswitch candidate, which is restricted  
37 to pathogenic mycobacteria, suggesting a role in virulence. Moreover, we have used  
38 translation start site mapping to re-annotate the RpfB start codon and identified and  
39 validated a ribosome binding site that is likely to be targeted by an RpfB antisense RNA.  
40 Finally, we show that *rpfB* is co-transcribed with downstream genes, *ksgA* and *ispE*. *ksgA*  
41 encodes a universally conserved methyl transferase involved in ribosome maturation and  
42 *ispE* encodes an essential ATP-dependent kinase involved in cell wall synthesis. This  
43 arrangement implies co-regulation of resuscitation, cell wall synthesis and ribosome  
44 maturation via the RNA switch. We propose that deregulation of this switch, associated with  
45 cell wall synthesis and ribosome function, presents a new target for anti-tuberculosis drug  
46 development.

47

## 48 **Importance**

49 This work describes the identification and characterisation of a novel regulatory RNA  
50 element/attenuator that controls cell wall synthesis and ribosome function in  
51 *Mycobacterium tuberculosis*, the causative agent of human tuberculosis (TB). By switching  
52 between two different conformations, this RNA switch can either enable or inhibit  
53 transcription of a tri-cistronic mRNA that encodes a cell-wall remodelling enzyme crucial for  
54 activation of latent TB, an RNA methyltransferase that is important for ribosome function  
55 and a protein kinase essential for early steps in cell wall synthesis. This RNA switch is only  
56 present in a subset of pathogenic mycobacteria, and by regulating the expression of three  
57 genes associated with classical antimicrobial targets we believe that it offers a novel  
58 important target for future anti-tuberculosis drugs.

59

## 60 Introduction

61 The ability to switch between actively replicating and non-replicating persistence (NRP) is at  
62 the heart of *Mycobacterium tuberculosis*' success as a pathogen. *M. tuberculosis* expresses  
63 five resuscitation-promoting factors (RpfA-E) (1). These are cell wall remodelling enzymes  
64 critical for the transition of *M. tuberculosis* between dormancy and resuscitation, and for  
65 reactivation of tuberculosis (TB) in animal models (2-4). In an *in vivo* environment, *M.*  
66 *tuberculosis* forms cells that can only be grown with Rpf supplementation (5).

67 Precise and tight control of Rpf expression is vital as these enzymes are able to degrade the  
68 bacterial cell wall posing a potentially lethal threat to *M. tuberculosis* itself. Expression of  
69 the five Rpfs is induced by different triggers, many of which are associated with the host  
70 environment (6,7). ChIP-seq data indicates that several transcription factors, including MtrA  
71 and Lsr2 regulate these promoters (8).

72 RNA-based regulation (ribo-regulation) of bacterial gene expression has attracted increasing  
73 attention over the last decade, as the abundance of the molecules and the systems they  
74 regulate become increasingly obvious (9-14). One class of riboregulators are the RNA-  
75 switches, *cis*-regulatory elements, located largely within the 5' untranslated region (UTR) of  
76 the mRNA they regulate. Upon sensing a physiological signal such as temperature, pH,  
77 metabolites, RNA or proteins, they switch between conformations that are either  
78 permissive or non-permissive for downstream gene expression; RNA switches regulated by  
79 small molecule ligands are specifically referred to as riboswitches, and these currently make  
80 up the largest class of RNA switches (13,15,16). Riboswitches are formed of distinct domains  
81 with an aptamer domain responsible for binding a specific ligand, and an expression  
82 platform that regulates transcription or translation downstream (17). Most of the  
83 riboswitches described to date are widespread and associated with biosynthetic pathways;  
84 however, there are examples of less widespread riboswitches, and it is likely that there are  
85 many more, some of which may never be identified due to their rare occurrence (17,18).  
86 Riboswitches have been highlighted as potential drug targets due to their inherent ability to  
87 interact with a variety of ligands. For example, the FMN riboswitch has been suggested as  
88 potential drug target against *M. tuberculosis* infection (19).

89 Here we identify a novel transcriptional RNA switch (riboswitch candidate) located within  
90 the 5' UTR of *M. tuberculosis rpfB*, and restricted to a subset of pathogenic mycobacteria.  
91 Based on experimental evidence, we have re-annotated the RpfB start codon and identified

92 a likely Shine-Dalgarno (SD) sequence (20) that overlaps with an asRNA transcribed opposite  
93 to RpfB. The genetic arrangement of *rpfB* flanked upstream by the *tatD* nuclease, and  
94 downstream by the universally conserved *ksgA* methyl transferase and the essential *ispE*  
95 kinase is conserved in a wide range of Actinobacteria (Fig. S1) (21). We show that *rpfB*, *ksgA*  
96 and *ispE* are co-transcribed indicating a tight regulatory link between resuscitation, cell wall  
97 synthesis and ribosome maturation, subject to regulation by this novel element.

98

## 99 **Results.**

### 100 **Promoters and transcripts of the *rpfB* locus**

101 Through interrogation of *M. tuberculosis* (d)RNA-seq (22), we found that *rpfB* is expressed  
102 from two promoters: P1, with transcription start site (TSS) at G1127876, and P2 with TSS at  
103 A1127955. For both TSS we identified canonical (TANNNT) -10 regions (Fig. 1). RNA-seq also  
104 indicates the presence of an antisense RNA expressed from P<sub>as</sub> with TSS at G1128048.

105 Expression from these promoters was validated by cloning the region from 140 basepairs  
106 upstream of P1 to the annotated ATG start codon in frame to a *lacZ* reporter (Fig. 1). In  
107 addition, we made three derivatives mutating the -10 regions of either P1 or P2 separately  
108 or in both P1 and P2. Finally, we made a transcriptional fusion of P<sub>as</sub> including 100 basepairs  
109 of upstream region. The constructs were transformed into *M. tuberculosis* and promoter  
110 activity was assessed by colony colour on X-gal plates (Fig. 1C). Mutating the promoters  
111 individually suggested that P1 and P2 are both active in *M. tuberculosis*, corroborating the  
112 RNA-seq data. The lack of expression in the double mutant supports the TSS mapping  
113 indicating that P1 and P2 are the only promoters driving *rpfB* expression. Moreover, the  
114 results indicate that P<sub>as</sub> is active and likely to play a role in *rpfB* expression.

115

### 116 **RpfB translation start site**

117 The annotated translation start site of RpfB is ATG (Fig. 1). However, there is no obvious SD  
118 sequence proximal to this start codon; moreover, the start sites of the RpfB homologues in  
119 *Mycobacterium leprae* and *Mycobacterium smegmatis* have been annotated 13 codons  
120 further upstream, corresponding to the alternative TTG start (Fig. 1), which has a likely SD  
121 sequence upstream. In line with previous observation, we considered that the RpfB start  
122 codon may have been mis-annotated (23,24). We found two potential start sites (TTG and  
123 GTG) upstream of the annotated ATG (Fig. 1). In order to define which of the potential start

124 sites was correct, we modified the method developed by Smollett et al. for translation start  
125 site mapping (24), using the wildtype translational *lacZ* fusion described above. Frameshift  
126 mutations were introduced separately between GTG and TTG and between TTG and ATG. If  
127 a frameshift were located within the resulting coding sequence, functional beta-  
128 galactosidase ( $\beta$ -gal) would not be expressed. The constructs were transformed into *M.*  
129 *smegmatis*, a tractable surrogate host for the expression of *M. tuberculosis* genes, and cell  
130 extracts were assayed for  $\beta$ -gal activity.

131 The results, shown in Fig. 2, demonstrate that the frameshift between GTG and TTG  
132 retained ~75% of wildtype  $\beta$ -gal activity level, suggesting that this part of the transcript was  
133 outside the translated region. However, the frameshift between TTG and ATG reduced  $\beta$ -gal  
134 activity to the level of the empty vector, indicating the mutation lay within the translated  
135 region and hence that TTG was the correct start codon (Fig. 2). As this result was in conflict  
136 with previously published data (25), we employed an alternative method to validate our  
137 findings. Each of the three potential start sites (GTG, TTG, ATG) was mutated to non-start  
138 codons (GTC, TTA, AAG), and  $\beta$ -gal activity of the resulting constructs assayed. The results  
139 (Fig. 2) corroborated our findings from the frameshift experiment; changing GTG and ATG to  
140 non-start codons did not significantly reduce  $\beta$ -gal activity, while changing the TTG to TTA  
141 reduced the expression to empty vector level, thus verifying that TTG was the correct start  
142 codon. Further supporting this notion was the fact that we could only identify a putative SD  
143 sequence -10 to -20 relative to TTG (Fig. 1B). To investigate if this sequence affected *rpfB*  
144 expression, we mutated the SD purines to pyrimidines in the *lacZ* fusion. The  $\beta$ -gal activity  
145 of the resulting construct was reduced to the level of the empty vector (SD mut, Fig. 2),  
146 suggesting that this was a likely ribosome binding site.

147 Finally, we transformed selected constructs with altered start sites into *M. tuberculosis* to  
148 ensure there were no significant differences compared to *M. smegmatis*. The results in *M.*  
149 *tuberculosis*, seen as blue/white colony colour (Fig. 2), were in perfect agreement with the  
150 results obtained in *M. smegmatis*, supporting the notion that the correct translation start  
151 site for *M. tuberculosis* RpfB is the relatively unusual TTG codon.

152

153

154

## 155 **The RpfB 5' UTR**

156 The first 130 nucleotides of the RpfB 5' UTR expressed from P1 include an inverted repeat  
157 (red arrows, Fig. 1) followed by a poly-U tract, suggestive of a potential intrinsic terminator.  
158 Using *mfold* (26), we found that the predicted structure of the 130 nucleotides does indeed  
159 contain a stem-loop followed by a poly-U tract (Fig 3A). In order to determine if this  
160 sequence might lead to premature transcription termination, we analysed RNA from  
161 exponential and stationary phase cultures of *M. tuberculosis* and the closely related  
162 *Mycobacterium bovis* BCG by Northern blotting. Figure 3B shows a Northern blot with a  
163 strong signal around 125 nucleotides in exponential phase from both species, consistent  
164 with a terminated transcript. In addition, there are several weaker signals corresponding to  
165 larger transcripts. In stationary phase, there was little or no expression in both species, in  
166 concordance with previous observations (6,27).

167 To identify more precisely the 3' termini associated with the RpfB 5' UTR, we performed 3'  
168 RACE as previously described (28). The results indicated that 12% of transcripts terminated  
169 well upstream of the poly-U tract, and 42% terminated within or proximal to the poly-U  
170 tract with U123 and U124 alone accounting for 17% (Fig. S2). Further downstream we found  
171 that 8% terminated at the newly annotated TTG, indicating transcriptional pausing  
172 associated with translation initiation, as recently reported for the TPP riboswitch (29).

173 The fact that more than a third of all 3' termini fall within the poly-U tract, strongly favours  
174 the presence of a functional intrinsic terminator. The results also suggest that U117 is part  
175 of the poly-U tract and not the preceding stem as the structure in Fig. 3A suggests. We  
176 therefore re-modelled the RNA with the constraints that residues downstream of A116  
177 were unpaired. This resulted in two alternatives; one with a slightly modified terminator  
178 structure and lower free energy than the original ( $\Delta G$  -50.2 vs -49.6 kcal/mol); the other  
179 without terminator and with a higher free energy ( $\Delta G$  -44.7 kcal/mol); we consider the latter  
180 a potential anti-terminated or read-through conformation (Fig. 3C).

181 In summary, our results indicate that the 5' UTR of RpfB can adopt two conformations, one  
182 of which contains an intrinsic terminator, suggesting that this element comprises a novel  
183 RNA switch.

184

185

186

## 187 **Translational reporter fusions support the notion of an RNA switch**

188 In order to verify and further characterise this putative, novel RNA switch we employed the  
189 previously described translational *lacZ* fusion. First, we compared constructs with and  
190 without the RNA switch, deleting the entire region from TSS1 to the end of the poly-U tract.  
191 This resulted in a significant increase in  $\beta$ -gal activity, suggesting that the RNA switch  
192 provides an additional layer of control by reducing RpfB expression during exponential  
193 growth (Fig. 4). The two conformations of the RpfB 5' UTR are likely to exist in an  
194 equilibrium *in vivo*. We used these structures to predict single-nucleotide substitutions that  
195 could stabilise either conformation. Thus, a U6C substitution (green circles, Fig. 3C) would  
196 favour the anti-terminated structure, while a G112C substitution (red circles, Fig. 3C) would  
197 favour the terminated structure. The mutations were introduced into the *lacZ*-fusions and  
198  $\beta$ -gal activity determined. The results (Fig. 4) demonstrate that stabilising the predicted  
199 terminator leads to significantly reduced *lacZ* expression (Fig. 4), while stabilising the anti-  
200 terminator structure leads to significantly increased expression (Fig. 4). To further probe the  
201 intrinsic terminator, we made a mutant in which U117 to U119 were changed to adenines.  
202 This resulted in increased expression similar to that observed for the U6C mutant. These  
203 results substantiate the presence of the two structures and the potential to switch between  
204 these.

205 Together our results strongly support that the RpfB 5' UTR comprises a novel,  
206 transcriptional RNA switch that provides an additional layer of regulation to RpfB  
207 expression. As the terminated conformation has the lowest predicted free energy of the  
208 two, we assume it is the default conformation, and that its cognate ligand would promote  
209 read-through. Moreover, we find evidence of pausing associated with the start codon,  
210 which may provide even further control of RpfB expression.

211

## 212 ***rpfB*, *ksgA* and *ispE* form a tri-cistronic operon**

213 Immediately downstream of the *rpfB* gene lies a gene encoding the highly conserved methyl  
214 transferase, KsgA that specifically methylates two adjacent adenosine residues in the 3' end  
215 of the 16S ribosomal RNA (residues 1511 and 1512 within the sequence GGAAG in *M.*  
216 *tuberculosis*). This process is regarded as a checkpoint for ribosome maturation (30). There  
217 are no TSS identified between the *rpfB* 5' UTR and the *ksgA* gene (Fig. 5), indicating that the  
218 two genes are part of the same operon. Moreover, according to the annotation, the ORFs

219 for these two genes overlap, suggesting a very tight coupling in their expression. We tested  
220 if the two genes were co-transcribed using RT-PCR. The results, shown in Fig. 5 suggest that  
221 *rpfB* and *ksgA* are co-transcribed in both *M. tuberculosis*, *M. bovis* BCG and in the more  
222 distantly related *M. smegmatis*. In *M. tuberculosis*, but not in *M. smegmatis*, lies the the  
223 essential *ispE* downstream of *ksgA*. This gene encodes an essential ATP-dependent kinase  
224 involved in isoprenoid synthesis and ultimately, cell wall synthesis by providing the linker  
225 unit between arabinogalactan and peptidoglycan (31). Although there is a weak TSS 37  
226 basepairs upstream of the annotated *IspE* GTG start codon as well as a consensus -10 motif  
227 (TAGTCT), we tested the possibility that *ispE* was co-transcribed with *rpfB* and *ksgA* due to  
228 the close proximity of the ORFs. The result, shown in Fig. 5, indicates that this is indeed the  
229 case and hence that *rpfB*, *ksgA* and *ispE* form a tri-cistronic operon in *M. tuberculosis* with  
230 an internal promoter driving baseline expression of *ispE*.

231 This, in turn indicates that *rpfB*, *ksgA* and *ispE* expression is regulated by the same RNA  
232 switch in *M. tuberculosis*. This arrangement provides a regulatory link between  
233 resuscitation, cell wall synthesis and ribosome maturation. It also offers the possibility that a  
234 cognate ligand could be associated with *KsgA* or *IspE* as well as with *RpfB*.

235

### 236 **Expression of RpfB during re-growth and nutrient starvation**

237 To obtain a more detailed picture of termination and read-through of the RNA switch, we  
238 investigated the expression under different growth conditions. Initially we looked at  
239 expression as cells emerge from stationary phase into log-phase. A stationary phase culture,  
240 in which *RpfB* is poorly expressed, was diluted into fresh medium followed by RNA sampling  
241 over time. Fig. 6A shows a Northern blot of the time course probed for the RNA switch,  
242 which indicates robust expression of the terminated transcript after one hour in fresh  
243 medium, while expression of the longer, read-through transcripts reached a maximum later  
244 (around 5 hours) into the time course, suggesting that the cells require more time to  
245 achieve ligand concentrations permissive of read-through. We also investigated expression  
246 after the cells had been shifted to starvation conditions. Exponential phase culture was  
247 resuspended in nutrient deficient PBS+Tween80 followed by RNA sampling over time. Fig.  
248 6B shows that P1-driven expression of *RpfB* ceases relatively quickly following nutrient  
249 starvation.

250



## 251 **Expression of RpfB in biofilms**

252 The formation of mycobacterial biofilms requires significant changes in gene expression  
253 followed by substantial re-arrangements of the cell wall (32); however, changes in Rpf  
254 expression have not been reported. We investigated the expression of the RNA switch as  
255 well as RpfB, asRpfB and KsgA in biofilms of *M. bovis* BCG, a close, more tractable relative of  
256 *M. tuberculosis* in which the entire *rpfB-ispE* transcript, including 5' UTR, is 100% conserved.  
257 Biofilms were allowed to form in static, non-aerated cultures for the indicated period of  
258 time after which the pellicle was removed and processed for RNA. Quantitative real-time  
259 PCR (qRT-PCR) was performed for the 5' UTR, P1 read-through, RpfB, asRNA and KsgA;  
260 details of these amplicons are outlined in Fig. S3, and the results are shown in Fig. S4. The  
261 results indicated that the level of all measured RNAs was slightly, but not significantly  
262 reduced during the initial stages of biofilm formation, but recovering as the biofilm  
263 matured. As *ispE* expression is driven by an additional promoter, we did not include this in  
264 our investigation.

265 In order to obtain values for transcriptional read-through vs termination within P1 derived  
266 transcripts, we normalised the raw values as outlined in Fig. S4. The final result, shown in  
267 Fig. 6C, indicates the level of P1-derived *rpfB* transcripts normalised to the values obtained  
268 for the 5' UTR. The results can therefore be used as an approximation of the proportion of  
269 transcripts that proceed through the terminator region into the *rpfB* coding region.  
270 Similarly, we normalised the values for *ksgA* transcripts to *rpfB* transcripts to obtain a  
271 measure of relative abundance of the two cistrons. Overall the results indicate that there  
272 are no significant changes in the relative amounts of the investigated transcripts during  
273 biofilm formation.

274

## 275 **Transcription of the RpfB attenuator *in vitro***

276 In order to screen putative ligands of the RpfB RNA switch, we designed a single-round *in*  
277 *vitro* transcription assay. Since all four nucleotides are present within the first six positions  
278 of the RNA switch, we modified the 5' end marginally to obtain a template that was suitable  
279 for single-round *in vitro* transcription (see Supplementary methods). We first tested the  
280 wildtype RNA switch and the three mutants from the reporter constructs, expressed from a  
281 heterologous promoter. Transcription read-through was observed either as template run-off  
282 or read-through SynB synthetic terminator (33). Halted elongation complexes were formed

283 using *Escherichia coli* RNA polymerase (RNAP) and chased in the presence of heparin. The  
284 results demonstrated that the RpfB terminator is recognised by the *E. coli* RNAP resulting in  
285 approximately half of the complexes pausing/terminating at the predicted site (Fig. 7A,  
286 lanes 1 and 5), while the remaining continue transcription to obtain either the run-off  
287 transcript (lane 1) or the SynB terminated transcript (lane 5). Stabilising the terminator stem  
288 led to multiple signals around the RpfB terminator (lanes 2 and 6), while the run-off and the  
289 SynB terminated transcript were both replaced by aberrant signals that were approximately  
290 30-40 nucleotides longer.

291 As this size transcript exceeded the theoretical maximum length possible using the  
292 template, we treated the samples with DNase to investigate the possibility of template  
293 labelling activity (not shown). However, this did not remove the aberrant signal, a  
294 phenomenon that we are currently unable to explain. More importantly, the two mutants,  
295 U6C and U117-119A both displayed decreased termination at the RpfB terminator and  
296 increased read-through, supporting the *in vivo* findings and lending significant support to  
297 the presence of a transcriptionally regulated RNA attenuator (Fig. 7A, lanes 3, 4, 7 and 8).  
298 Some transcriptionally regulated RNA attenuators require the RNAP to pause at specific  
299 sites to allow co-transcriptional folding and ligand binding (34). We investigated the pausing  
300 pattern of the RNA switch in a time-course experiment in the presence and absence of  
301 NusA, a transcription factor known to promote transcriptional pausing. As suspected, there  
302 were several pause sites within the sequence, most of which were enhanced in the  
303 presence of NusA, resulting in an overall reduced elongation rate (Fig 7B). We observed a  
304 particularly enhanced pause signal around position 41 and 43, corresponding to positions 37  
305 and 39 in the true RNA switch transcript (indicated with +++ in Fig. 7B).

306 These results suggest that *in vivo*, NusA may be required to allow more time for potential  
307 ligand interactions which may be necessary for anti-terminator formation and  
308 transcriptional read-through.

309

### 310 **The RpfB attenuator is restricted to a subset of pathogenic mycobacteria**

311 Many riboswitches are highly conserved, particularly between closely related species. To  
312 investigate the occurrence of the newly identified RpfB attenuator, we aligned sequences  
313 upstream of the RpfB coding region from seven mycobacterial species (Fig. 8). The  
314 alignment indicated that the P2 -10 region is identical in all of the selected species.

315 P1, on the other hand, is less well-conserved, and the TANNNT -10 consensus indicative of a  
316 functional promoter is only seen in *M. tuberculosis*, *M. bovis*, *M. marinum* and *M. ulcerans*,  
317 suggesting that the long 5' UTR is restricted to a subset of pathogenic mycobacteria;  
318 additional species from the MTBC, including *Mycobacterium africanum*, *Mycobacterium*  
319 *microti* and *Mycobacterium canetti* had sequences that were identical to *M. tuberculosis*  
320 (not shown). A more extensive alignment is shown in Fig. S5. To investigate the termination  
321 potential within the selected species, regardless of P1, we analysed the region using  
322 Transterm (35) to identify putative hairpins/terminators. Only *M. tuberculosis*, *M. bovis*, *M.*  
323 *marinum*, *M. ulcerans* and *M. kansasii* have hairpins followed by at least four consecutive  
324 uracil residues, indicative of a functional terminator (33,36) (Fig. S6). Thus, on the basis of  
325 promoter and terminator motifs we conclude that this RNA attenuator is only present in a  
326 subset of pathogenic mycobacteria with a phylogenetic split between MBTC/*M.*  
327 *marinum*/*M. ulcerans* and *M. leprae*, which is consistent with the split seen by aligning 16S  
328 sequences (37). Moreover, only *M. tuberculosis*, *M. bovis* and *M. avium* appear to have a  
329 functional antisense promoter, indicating that the presumably tight regulation provided by  
330 multiple promoters, RNA attenuator and asRNA is specific for species within the MTBC. The  
331 association of this element with certain pathogenic species only, offers the possibility that  
332 its function is associated with pathogenesis and adaptation to the host environment.

333

## 334 **Discussion**

335 RpfB are cell wall remodelling enzymes with the potential to lyse and kill the cells that  
336 express them. Hence, their expression is under tight often multi-layered control, and we  
337 propose disruption of such control as a target for drug development. In the current study,  
338 we have shown that multipronged regulation also applies to the expression of *M.*  
339 *tuberculosis* RpfB. This gene is transcribed from two promoters and post-transcriptionally  
340 regulated by an entirely novel pathogen-specific, transcriptionally regulated RNA switch.  
341 Moreover, we provide evidence for a functional antisense promoter, which may regulate  
342 RpfB expression by RNA polymerase collision, inhibition of translation initiation, mRNA  
343 processing or all of the above. We also show that this level of multi-layered control appears  
344 to be specific for species within the MTBC, as one or more of the described elements are  
345 absent from other mycobacterial species. Moreover, we show that *rpfB*, *ksgA* and *ispE* form  
346 a tri-cistronic operon, implying that all of these regulatory mechanisms may extend to *ksgA*

347 and *ispE* expression as well. However, *ispE* is essential and expression likely to be affected in  
348 the previously described *rpfB* deletion strain (38). Hence, we assume that the weak TSS  
349 upstream of *ispE* is sufficient for survival, while the tri-cistronic arrangement with *rpfB* and  
350 *ksgA* ensures coordinated expression of the genes directed by the RNA switch. In addition,  
351 we have re-annotated the translation start site and identified a likely ribosome-binding site  
352 based on several lines of experimental evidence. Finally, we also found evidence of ‘start  
353 codon associated pausing’, which has recently been shown to have importance for  
354 riboswitch-regulated gene expression (29).

355 In contrast to the relatively well-conserved genetic arrangement of *tatD-rpfB-ksgA*, the RNA  
356 switch is restricted to a small subset of pathogenic mycobacteria, including *M. tuberculosis*.  
357 Based on predictions of structure and free energy, we expect that a cognate ligand increases  
358 transcriptional read-through.

359 Our *in vitro* transcription assays demonstrate that there are several pause sites within the  
360 RNA switch region and that these are enhanced by NusA. We expect that these pauses may  
361 be critical for co-transcriptional folding and ligand recognition.

362 Some of our results did not agree with those previously published (25). We did investigate  
363 the possibility of an additional promoter downstream of P2, but our reporter gene fusions  
364 and previously published dRNA-seq (22) confirm that there is no promoter activity in that  
365 region. We employed two different means of determining the translation start and findings  
366 were further supported by the presence of a likely SD sequence. Therefore, we regard TTG  
367 as the correct start site. This also means that the asRNA is positioned immediately upstream  
368 of the start codon and covering the newly identified SD sequence.

369 At present, we have not identified a ligand for this RNA switch, although several have been  
370 tested in our *in vitro* transcription assay. The different growth conditions tested here do not  
371 allude to any specific ligand. It remains a possibility that the switch between termination  
372 and anti-termination is not mediated by a small molecule, characteristic of a *bona fide*  
373 riboswitch, but rather a protein ligand, similar to ribosomal protein operons or yet another  
374 molecule/mechanism capable of pushing the equilibrium between the two conformations.  
375 The lack of widespread conservation and the fact that the genes regulated by this element  
376 are not associated with metabolic pathways further complicates the prediction of this  
377 ligand. The coordinated expression of RpfB, KsgA and IspE fits a model in which one or more  
378 molecular signals leading to resuscitation and cell wall remodelling/synthesis associated

379 with growth, also lead to activation of protein synthesis by allowing the final steps in  
380 ribosome maturation. Moreover, the coordinated expression of the genes within this  
381 operon ensures that the cell maintains a carefully balanced ratio between different aspects  
382 of macromolecular synthesis, which is also apparent in operons encoding RNA polymerase  
383 subunits together with ribosomal proteins. The regulatory link described in this study means  
384 that resuscitation and ribosome maturation or rephased, cell wall synthesis and protein  
385 synthesis, two classical antimicrobial targets could be simultaneously targeted via the RpfB  
386 RNA switch. Disruption of the regulation of its action provides an opportunity for  
387 development of a novel class of anti-tubercular drugs with a unique mode of action.

388

## 389 **Materials and methods**

### 390 **Bacterial strains and growth conditions**

391 *E. coli* DH5 $\alpha$  were grown in LB liquid media or agar (1.5%) supplemented with 250  $\mu$ g/mL  
392 hygromycin B as required.

393 *Mycobacterium smegmatis* mc<sup>2</sup>155(39) was grown on LB agar supplemented with 50  $\mu$ g/mL  
394 hygromycin B as required, and in liquid LB media supplemented with 0.05% Tween 80 and  
395 50  $\mu$ g/mL hygromycin B as required. *M. tuberculosis* H37Rv (40) and *M. bovis* BCG were  
396 grown on Middlebrook 7H11 agar supplemented with 10% OADC, 0.5% glycerol and 50  
397  $\mu$ g/mL hygromycin B as required and in liquid Middlebrook 7H9 medium supplemented with  
398 10% ADC, 0.4% glycerol and 0.05% Tween 80 in roller bottles (Cell Master, Griener Bio-One)  
399 or PETG flasks (Nalgene, Thermo Scientific), respectively. Exponential phase cultures were  
400 harvested at OD<sub>600</sub> 0.6-0.8 Stationary phase cultures for *M. tuberculosis* and *M. bovis* BCG  
401 were harvested at least 1 week after 1.0 OD<sub>600</sub>. For time-course experiments, cultures were  
402 harvested as indicated. Biofilms were formed by adding 10 ml of an exponential phase  
403 culture to 50 ml polypropylene tubes, sealing tightly and leaving for the indicated amount of  
404 time. At time of harvest the pellicle was removed and processed for RNA. Mycobacteria  
405 were transformed by electroporation.

### 406 **Plasmid construction**

407 Plasmids used in this study are listed in Table S1.

### 408 **Oligonucleotides**

409 Oligonucleotides used during this study are listed in Table S2.

410 **RNA isolation**

411 Total RNA extraction was performed as previously described(28).

412 **cDNA synthesis and 3' rapid amplification of cDNA ends (RACE)**

413 cDNA was synthesised using Superscript III reverse transcriptase (Invitrogen), largely  
414 according to manufacturer protocol except for an additional extension step for 30 minutes  
415 at 55°C, priming reactions with random hexamers (Promega).

416 3' RACE was performed as previously described (41). Samples were reverse transcribed and  
417 primed using oligo d(T) adapter primer (oligonucleotide 2.07). RACE targets were amplified  
418 using adapter primer and a gene specific primer (oligonucleotide 2.09 and 2.15  
419 respectively).

420 Co-transcription of *rpfB* and *ksgA* was analysed using cDNA generated with random  
421 hexamers. cDNA was amplified with REDTaq PCR reaction using primers flanking the  
422 *rpfB/ksgA* overlapping region complementary to the sequence in *M. tuberculosis, bovis* BCG  
423 and *smegmatis* (oligonucleotides 5.51 and 8.04).

424 **Northern blotting**

425 Northern blotting and probing was performed as described in (41).

426 Template oligonucleotides are listed in Table S2. Membranes were exposed to a phosphor  
427 screen and developed using Typhoon FLA 9500 (GE), sizing RNAs using Century marker  
428 (Ambion).

429 **Quantitative RT-PCR**

430 'SensiFast SYBR Hi-ROX master mix' (Bio-line) was used to amplify cDNA for quantitative RT-  
431 PCR (qRT-PCR), according to manufacturer's instructions. *M. tuberculosis* H37Rv DNA was  
432 used to create a standard curve. Wells were loaded with either 1 µL standard in three  
433 technical replicates or 1 µL RT+/- cDNA in 4 technical replicates.

434 All reactions were carried out using a 'QuantStudio 6 Flex Real-Time PCR System' and  
435 analysed using QuantiStudio Real-time PCR software v1.1 (Applied Biosciences).

436 **β-galactosidase assay**

437 Protein extracts were obtained from cultures of *M. smegmatis* and assayed as previously  
438 described(28).

439 Miller units were expressed as a percentage of the average WT value. Statistical significance  
440 was calculated using one-way ANOVA with Tukey post hoc analysis in IBM SPSS  $\pm 1$  standard  
441 deviation. Significance thresholds specified as: 'NS' (no significant difference,  $P > 0.05$ ), '\*' ( $P$   
442  $\leq 0.05$ ), '\*\*' ( $P \leq 0.01$ ) and '\*\*\*' ( $P \leq 0.001$ ).

#### 443 ***In vitro* transcription**

444 *E. coli* RNAP *in vitro* transcription assays were carried out using previously described  
445 methods for producing halted transcription elongation complexes (TECs)(42,43).  
446 Transcription templates were cloned into pGAMrnnX (see supplemental methods for  
447 details).

#### 448 **Q5 site directed mutagenesis**

449 Site-directed mutagenesis (SDM) was carried out using the 'Q5 SDM kit' (NEB) following the  
450 manufacturer protocol. Correct constructs were sub-cloned into un-treated vector.

#### 451 **Overlap extension mutagenesis**

452 For small mutations, a pair of Phusion GC polymerase PCR reactions were carried out:  
453 reaction (A) used an upstream forward primer and a mutagenic reverse primer spanning the  
454 region to be mutated, reaction (B) used a downstream reverse primer and a mutagenic  
455 forward primer spanning the region to be mutated. The resulting amplicons contained a  
456 region of complementarity exploited in reaction (C) by combining 1  $\mu$ L of each as template  
457 in another PCR reaction with the non-mutagenic primers of the original reactions.

#### 458 **Alignment of the *tatD-rpfB* intergenic regions**

459 Test alignments of the intergenic regions between the *tatD* and *rpfB* genes in a number of  
460 mycobacteria indicated that a small number of mycobacterial species aligned well whereas  
461 others had large insertions and deletions. Based on the preliminary alignments, we selected  
462 a number of species with well-conserved intergenic regions to align first (Fig. 7) and  
463 subsequently added to this alignment three more species to highlight divergence in the  
464 sequences of the latter (Fig. S6). Further details can be found in supplementary methods.

465

#### 466 **Acknowledgements**

467 We thank Galina Mukamolova and Jeff Green for helpful discussions and Finn Werner for  
468 critical reading of the manuscript.

469

## 470 References

- 471 1. Rosser, A., Stover, C., Pareek, M. and Mukamolova, G.V. (2017) Resuscitation-  
472 promoting factors are important determinants of the pathophysiology in  
473 Mycobacterium tuberculosis infection. *Crit Rev Microbiol*, **43**, 621-630.
- 474 2. Chao, M.C. and Rubin, E.J. (2010) Letting sleeping dogs lie: does dormancy play a role  
475 in tuberculosis? *Annual review of microbiology*, **64**, 293-311.
- 476 3. Kana, B.D. and Mizrahi, V. (2010) Resuscitation-promoting factors as lytic enzymes  
477 for bacterial growth and signaling. *FEMS immunology and medical microbiology*, **58**,  
478 39-50.
- 479 4. Tufariello, J.M., Mi, K., Xu, J., Manabe, Y.C., Kesavan, A.K., Drumm, J., Tanaka, K.,  
480 Jacobs, W.R., Jr. and Chan, J. (2006) Deletion of the Mycobacterium tuberculosis  
481 resuscitation-promoting factor Rv1009 gene results in delayed reactivation from  
482 chronic tuberculosis. *Infection and immunity*, **74**, 2985-2995.
- 483 5. Turapov, O., Glenn, S., Kana, B., Makarov, V., Andrew, P.W. and Mukamolova, G.V.  
484 (2014) The in vivo environment accelerates generation of Resuscitation-promoting  
485 factor-dependent mycobacteria. *AJRCCM*.
- 486 6. Gupta, R.K., Srivastava, B.S. and Srivastava, R. (2010) Comparative expression  
487 analysis of rpf-like genes of Mycobacterium tuberculosis H37Rv under different  
488 physiological stress and growth conditions. *Microbiology*, **156**, 2714-2722.
- 489 7. Tan, S., Sukumar, N., Abramovitch, R.B., Parish, T. and Russell, D.G. (2013)  
490 Mycobacterium tuberculosis responds to chloride and pH as synergistic cues to the  
491 immune status of its host cell. *PLoS Pathog*, **9**, e1003282.
- 492 8. Galagan, J.E., Minch, K., Peterson, M., Lyubetskaya, A., Azizi, E., Sweet, L., Gomes, A.,  
493 Rustad, T., Dolganov, G., Glotova, I. *et al.* (2013) The Mycobacterium tuberculosis  
494 regulatory network and hypoxia. *Nature*, **499**, 178-183.
- 495 9. Barquist, L. and Vogel, J. (2015) Accelerating Discovery and Functional Analysis of  
496 Small RNAs with New Technologies. *Annu Rev Genet*, **49**, 367-394.
- 497 10. Dar, D., Shamir, M., Mellin, J.R., Koutero, M., Stern-Ginossar, N., Cossart, P. and  
498 Sorek, R. (2016) Term-seq reveals abundant ribo-regulation of antibiotics resistance  
499 in bacteria. *Science*, **352**, aad9822.
- 500 11. Dersch, P., Khan, M.A., Muhlen, S. and Gorke, B. (2017) Roles of Regulatory RNAs for  
501 Antibiotic Resistance in Bacteria and Their Potential Value as Novel Drug Targets.  
502 *Frontiers in microbiology*, **8**, 803.
- 503 12. Kavita, K., de Mets, F. and Gottesman, S. (2017) New aspects of RNA-based  
504 regulation by Hfq and its partner sRNAs. *Current opinion in microbiology*, **42**, 53-61.
- 505 13. Serganov, A. and Nudler, E. (2013) A decade of riboswitches. *Cell*, **152**, 17-24.
- 506 14. Wagner, E.G. and Romby, P. (2015) Small RNAs in bacteria and archaea: who they  
507 are, what they do, and how they do it. *Adv Genet*, **90**, 133-208.
- 508 15. Breaker, R.R. (2012) Riboswitches and the RNA world. *Cold Spring Harbor*  
509 *perspectives in biology*, **4**.
- 510 16. Sherwood, A.V. and Henkin, T.M. (2016) Riboswitch-Mediated Gene Regulation:  
511 Novel RNA Architectures Dictate Gene Expression Responses. *Annual review of*  
512 *microbiology*, **70**, 361-374.
- 513 17. McCown, P.J., Corbino, K.A., Stav, S., Sherlock, M.E. and Breaker, R.R. (2017)  
514 Riboswitch Diversity and Distribution. *RNA*.
- 515 18. Breaker, R.R. (2011) Prospects for riboswitch discovery and analysis. *Molecular cell*,  
516 **43**, 867-879.



- 517 19. Colameco, S. and Elliot, M.A. (2017) Non-coding RNAs as antibiotic targets. *Biochem*  
518 *Pharmacol*, **133**, 29-42.
- 519 20. Shine, J. and Dalgarno, L. (1974) The 3'-terminal sequence of Escherichia coli 16S  
520 ribosomal RNA: complementarity to nonsense triplets and ribosome binding sites.  
521 *Proceedings of the National Academy of Sciences of the United States of America*, **71**,  
522 1342-1346.
- 523 21. Ravagnani, A., Finan, C.L. and Young, M. (2005) A novel firmicute protein family  
524 related to the actinobacterial resuscitation-promoting factors by non-orthologous  
525 domain displacement. *BMC genomics*, **6**, 39.
- 526 22. Cortes, T., Schubert, O.T., Rose, G., Arnvig, K.B., Comas, I., Aebersold, R. and Young,  
527 D.B. (2013) Genome-Wide Mapping of Transcriptional Start Sites Defines an  
528 Extensive Leaderless Transcriptome in Mycobacterium tuberculosis. *Cell Reports*, in  
529 press.
- 530 23. Dejesus, M.A., Sacchettini, J.C. and Ioerger, T.R. (2013) Reannotation of translational  
531 start sites in the genome of Mycobacterium tuberculosis. *Tuberculosis (Edinb)*, **93**,  
532 18-25.
- 533 24. Smollett, K.L., Fivian-Hughes, A.S., Smith, J.E., Chang, A., Rao, T. and Davis, E.O.  
534 (2009) Experimental determination of translational start sites resolves uncertainties  
535 in genomic open reading frame predictions - application to Mycobacterium  
536 tuberculosis. *Microbiology*, **155**, 186-197.
- 537 25. Sharma, A.K., Chatterjee, A., Gupta, S., Banerjee, R., Mandal, S., Mukhopadhyay, J.,  
538 Basu, J. and Kundu, M. (2015) MtrA, an essential response regulator of the MtrAB  
539 two-component system, regulates the transcription of resuscitation-promoting  
540 factor B of Mycobacterium tuberculosis. *Microbiology*, **161**, 1271-1281.
- 541 26. Zuker, M. (2003) Mfold web server for nucleic acid folding and hybridization  
542 prediction. *Nucleic acids research*, **31**, 3406-3415.
- 543 27. Arnvig, K.B., Comas, I., Thomson, N.R., Houghton, J., Boshoff, H.I., Croucher, N.J.,  
544 Rose, G., Perkins, T.T., Parkhill, J., Dougan, G. *et al.* (2011) Sequence-based analysis  
545 uncovers an abundance of non-coding RNA in the total transcriptome of  
546 Mycobacterium tuberculosis. *PLoS Pathog*, **7**, e1002342.
- 547 28. Moores, A., Riesco, A.B., Schwenk, S. and Arnvig, K.B. (2017) Expression, maturation  
548 and turnover of DrrS, an unusually stable, DosR regulated small RNA in  
549 Mycobacterium tuberculosis. *PLoS one*, **12**, e0174079.
- 550 29. Chauvier, A., Picard-Jean, F., Berger-Dancause, J.C., Bastet, L., Naghdi, M.R., Dube,  
551 A., Turcotte, P., Perreault, J. and Lafontaine, D.A. (2017) Transcriptional pausing at  
552 the translation start site operates as a critical checkpoint for riboswitch regulation.  
553 *Nature communications*, **8**, 13892.
- 554 30. Connolly, K., Rife, J.P. and Culver, G. (2008) Mechanistic insight into the ribosome  
555 biogenesis functions of the ancient protein KsgA. *Molecular microbiology*, **70**, 1062-  
556 1075.
- 557 31. Eoh, H., Brennan, P.J. and Crick, D.C. (2009) The Mycobacterium tuberculosis MEP  
558 (2C-methyl-d-erythritol 4-phosphate) pathway as a new drug target. *Tuberculosis*  
559 *(Edinb)*, **89**, 1-11.
- 560 32. Richards, J.P. and Ojha, A.K. (2014) Mycobacterial Biofilms. *Microbiol Spectr*, **2**.
- 561 33. Czyz, A., Mooney, R.A., Iaconi, A. and Landick, R. (2014) Mycobacterial RNA  
562 polymerase requires a U-tract at intrinsic terminators and is aided by NusG at  
563 suboptimal terminators. *mBio*, **5**, e00931.

- 564 34. Steinert, H., Sochor, F., Wacker, A., Buck, J., Helmling, C., Hiller, F., Keyhani, S.,  
565 Noeske, J., Grimm, S., Rudolph, M.M. *et al.* (2017) Pausing guides RNA folding to  
566 populate transiently stable RNA structures for riboswitch-based transcription  
567 regulation. *Elife*, **6**.
- 568 35. Kingsford, C.L., Ayanbule, K. and Salzberg, S.L. (2007) Rapid, accurate, computational  
569 discovery of Rho-independent transcription terminators illuminates their  
570 relationship to DNA uptake. *Genome Biol*, **8**, R22.
- 571 36. Gusarov, I. and Nudler, E. (1999) The mechanism of intrinsic transcription  
572 termination. *Molecular cell*, **3**, 495-504.
- 573 37. Zakhm, F., Aouane, O., Ussery, D., Benjouad, A. and Ennaji, M.M. (2012)  
574 Computational genomics-proteomics and Phylogeny analysis of twenty one  
575 mycobacterial genomes (Tuberculosis & non Tuberculosis strains). *Microb Inform*  
576 *Exp*, **2**, 7.
- 577 38. Tufariello, J.M., Jacobs, W.R., Jr. and Chan, J. (2004) Individual Mycobacterium  
578 tuberculosis resuscitation-promoting factor homologues are dispensable for growth  
579 in vitro and in vivo. *Infection and immunity*, **72**, 515-526.
- 580 39. Snapper, S.B., Melton, R.E., Mustafa, S., Kieser, T. and Jacobs, W.R., Jr. (1990)  
581 Isolation and characterization of efficient plasmid transformation mutants of  
582 Mycobacterium smegmatis. *Molecular microbiology*, **4**, 1911-1919.
- 583 40. Cole, S.T., Brosch, R., Parkhill, J., Garnier, T., Churcher, C., Harris, D., Gordon, S.V.,  
584 Eiglmeier, K., Gas, S., Barry, C.E., 3rd *et al.* (1998) Deciphering the biology of  
585 Mycobacterium tuberculosis from the complete genome sequence. *Nature*, **393**,  
586 537-544.
- 587 41. Arnvig, K.B. and Young, D.B. (2009) Identification of small RNAs in Mycobacterium  
588 tuberculosis. *Molecular microbiology*, **73**, 397-408.
- 589 42. Grundy, F.J., Winkler, W.C. and Henkin, T.M. (2002) tRNA-mediated transcription  
590 antitermination in vitro: codon-anticodon pairing independent of the ribosome.  
591 *Proceedings of the National Academy of Sciences of the United States of America*, **99**,  
592 11121-11126.
- 593 43. Landick, R., Wang, D. and Chan, C.L. (1996) Quantitative analysis of transcriptional  
594 pausing by Escherichia coli RNA polymerase: his leader pause site as paradigm.  
595 *Methods Enzymol*, **274**, 334-353.

596

597

## 598 **Figure Legends**

599 Fig. 1: Transcription start sites (TSS) and promoter elements in the *rpfB* locus. A: dRNA-seq  
600 and RNA-seq of the promoter region, 5' UTR and early ORF of *rpfB*. Numbers on the right  
601 indicate normalised reads. Three TSS were identified; two sense and one antisense (data  
602 from (22)). Below are schematics of the regions covered by the reporter constructs. B:  
603 Sequence of promoter region and 5' UTR of *rpfB*. Green boxes indicate the -10 hexamers of  
604 promoters P1, P2 and P<sub>as</sub>; green asterisks: TSS. Red arrows: inverted repeat leading to a  
605 stem-loop structure; blue box: annotated translation start site, blue dotted boxes:

606 alternative translation start sites, yellow box: putative ribosome binding site. C: X-gal plate  
607 with reporter constructs expressed in *M. tuberculosis*. Wildtype refers to 'full-length'  
608 construct from -140 upstream of P1 to the ATG. Mutations in the -10 region (TANNNT to  
609 CANNNC) are indicated by asterisk (i.e. P1\* has inactivated P1, but functional P2 and *vice*  
610 *versa*).

611

612 Fig. 2: Translation start site mapping. Left panel shows results of  $\beta$ -gal assays on  
613 translational reporters expressed in *Mycobacterium smegmatis*. GTG-ORF, TTG-ORF, ATG-  
614 ORF indicate the results of introducing frameshifts in the open reading frames downstream  
615 of the indicated putative start site. GTG>GTc, TTG>TTa, ATG>AaG indicate the results of  
616 changing the putative start site to a non-start codon. The last bar in the graph shows the  
617 activity of the mutated SD sequence (GAGGTCGGGGA to ctccTCcccct). Right panel shows  
618 translation start site and SD mutants expressed in *M. tuberculosis*.

619

620 Fig. 3: *rpfB* 5' UTR. A: *mfold* (26) predicted structure (without constraints) of the first 130  
621 nucleotides of the RpfB 5' UTR containing an intrinsic terminator structure. B: Northern blot  
622 of RNA from exponential and stationary phase cultures of *M. tuberculosis* and *M. bovis* BCG.  
623 RNA was separated by PAGE, transferred to a nylon membrane and probed with a ribo-  
624 probe indicated in Fig. 1B. C: Alternative structures of the RpfB 5' UTR (1-130). The figure  
625 shows the two structures that were predicted with *mfold* (26) with the constraints that  
626 U117 is unpaired. Termination frequencies, (3' RACE) have been indicated with bars. Point  
627 mutations that stabilise either the left conformation or the right conformation have been  
628 indicated with red and green circles, respectively. Red highlight indicates the terminator  
629 with the same sequence shown in green in its anti-terminated conformation.

630

631 Fig. 4: Reporter gene assays support the presence of an RNA switch. The figure shows  $\beta$ -  
632 galactosidase activity of translational reporters expressed in *M. smegmatis*. The constructs  
633 include the promoter region, 5' UTR and 14 codons of the RpfB ORF, including ATG, as  
634 shown in Fig. 1.  $\Delta$ RBSW: entire RNA switch deleted from the construct; U6C anti: point  
635 mutation predicted to stabilise the anti- terminated conformation; G112C term: point  
636 mutation predicted to stabilise the terminated conformation; U117-119A: change of three U

637 residues to A residues. The values represent the mean and standard deviation of 6 biological  
638 replicates; \*P ≤ 0.05; \*\*\*P ≤ 0.001.

639

640 Fig. 5: Co-transcription of *rpfB* with downstream genes. Main image shows three TSS  
641 associated with the *M. tuberculosis rpfB* locus on the plus strand; two for *rpfB* and a minor  
642 for *ispE*, according to global TSS mapping (22). Black arrows below locus indicate primers  
643 used for RT-PCR. Inserts show RT-PCR; left: *rpfB* and *ksgA* are co-transcribed in *M.*  
644 *tuberculosis (Mtb)*, *M. bovis* BCG (BCG) and *M. smegmatis (Msm)*; right: *rpfB*, *ksgA* and *ispR*  
645 are all co-transcribed in *Mtb*.

646

647 Fig. 6: Expression and turnover of the RpfB 5' UTR. Northern blots of *M. tuberculosis* RNA  
648 harvested at the indicated time points; RpfB-att corresponds to terminated transcript. A:  
649 after dilution of a stationary phase culture (1 week after OD<sub>600</sub>=1) into fresh medium. B:  
650 shows that expression of RNA switch ceases quickly after cells have been shifted to PBS +  
651 0.05% Tween. For both 15 µg of RNA was separated by PAGE, transferred to a nylon  
652 membrane and probed for the RNA switch (oligos 1.48 for 5S RNA and 5.22 for RNA switch).  
653 C: Expression during biofilm formation. Normalised expression of P1 read-through and *ksgA*  
654 transcripts. Values for P1 derived *rpfB* mRNA (Fig. S4) were normalised to values for 5' UTR  
655 RNA (P1*rpfB*/*rpfB-att*), and values for *ksgA* coding RNA were normalised to *rpfB* coding RNA.  
656 The graph illustrates the amount of P1-derived *rpfB* transcript relative to the amount of 5'  
657 UTR transcript over 12 weeks of biofilm formation. Values represent mean and SD of three  
658 biological replicates.

659

660 Fig. 7: *In vitro* transcription of RNA switch. Transcription was initiated with GpU, omitting  
661 UTP from the initial reaction and labelling with 32P-αATP. Lanes 1-4 show reactions with  
662 run-off template; lanes 5-8 shows reaction from template with SynB-mediated termination  
663 instead of run-off. Lanes, 1+5: wildtype; 2+6: G112C term; 3+7: U6C antiterm; 4+8: U117-  
664 119A poly(A). B: Single-round *in vitro* transcription of the RpfB RNA switch. The RpfB RNA  
665 switch was transcribed *in vitro* with *E. coli* RNAP. Initiation complexes were stalled at  
666 position 11 and elongated in the presence of heparin and 50 µM NTP at 30°C. Left image is  
667 with RNAP only and right gel image is in the presence of 5-fold molar excess NusA. +  
668 symbols indicate regions with NusA enhanced pausing.

669 Fig. 8: Sequence alignment of *rpfB* promoter regions and 5' UTRs. Selected *Mycobacterium*  
670 *spp* are aligned: *M. tuberculosis* (*M.tb*), *M. bovis* (*M.bo*), *M. marinum* (*M.ma*), *M. ulcerans*  
671 (*M.ul*), *M. shinjukuense* (*M.sh*), *M. kansasii* (*M.ka*), *M. avium* (*M.av*); an extended alignment  
672 can be seen in Fig. S5. The alignment is coloured by % sequence identity (darker blue =  
673 higher conservation). Green boxes: -10 regions; blue box: TTG start codon; blue dashed box:  
674 previously annotated ATG start; yellow box: SD sequence. Red arrows: inverted repeats,  
675 followed by red line indicating poly-U tract based on *M. tb* sequence.  
676

677 **Figures**

678

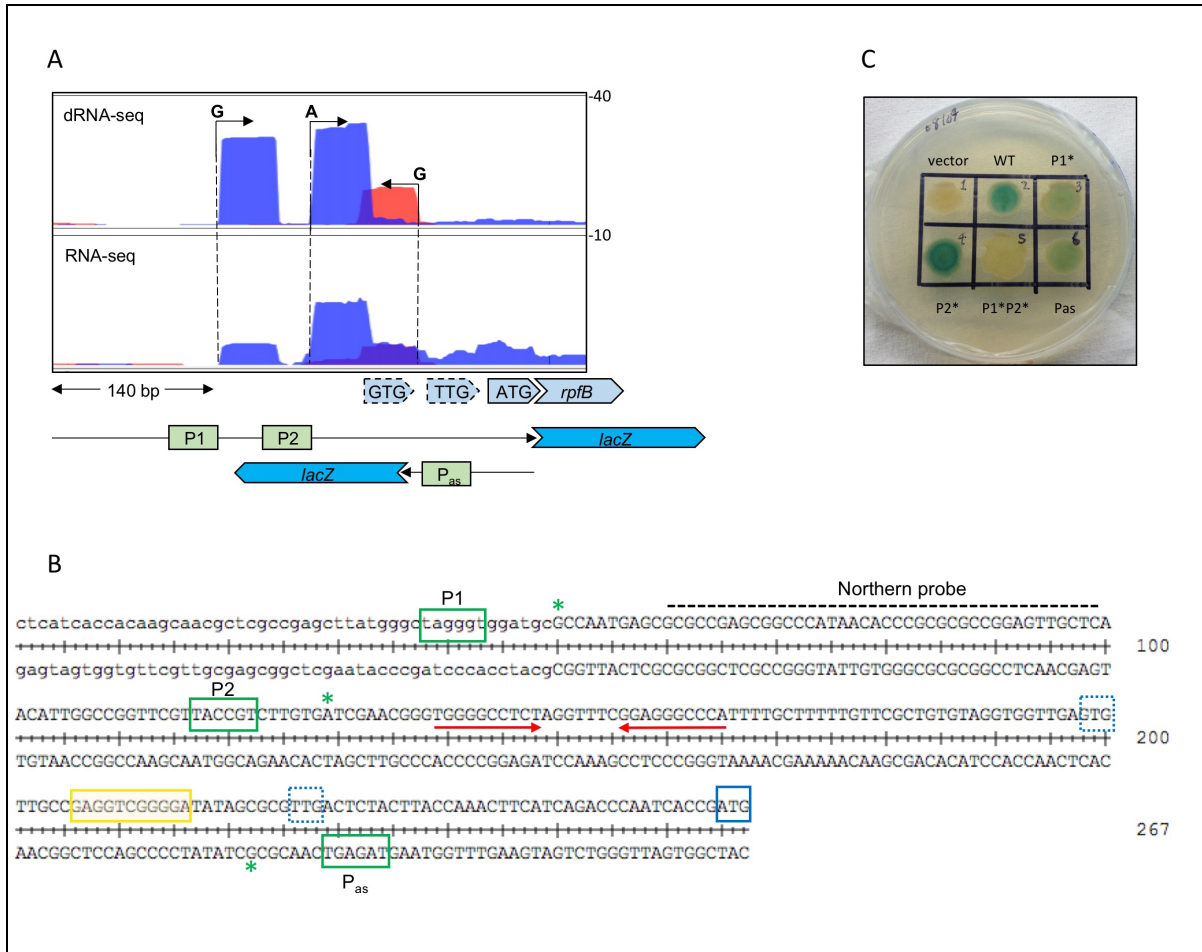

679 Fig. 1

680

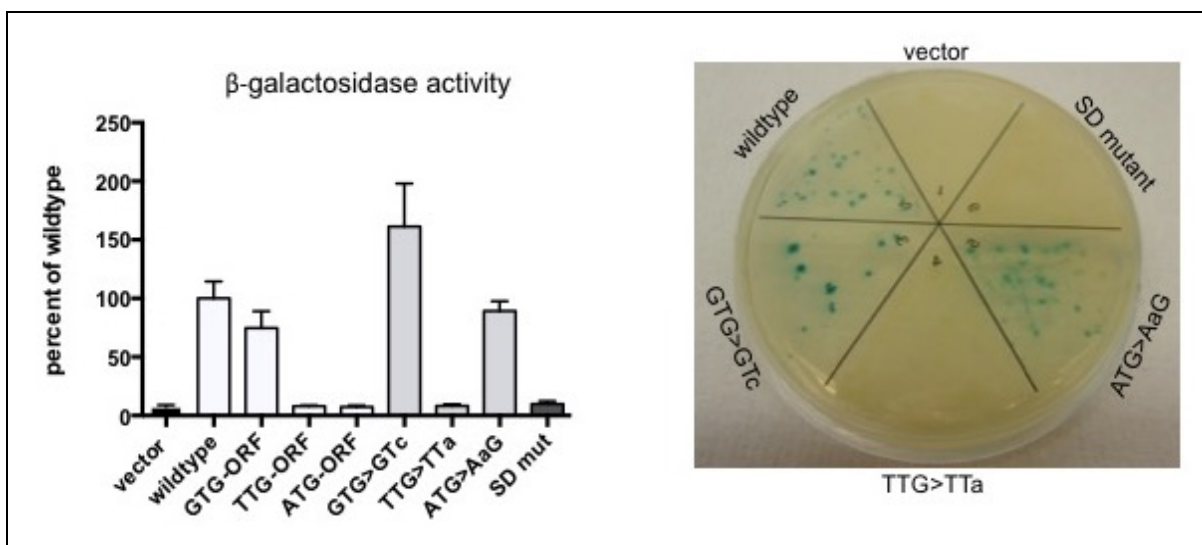

681 Fig. 2

682

683

684

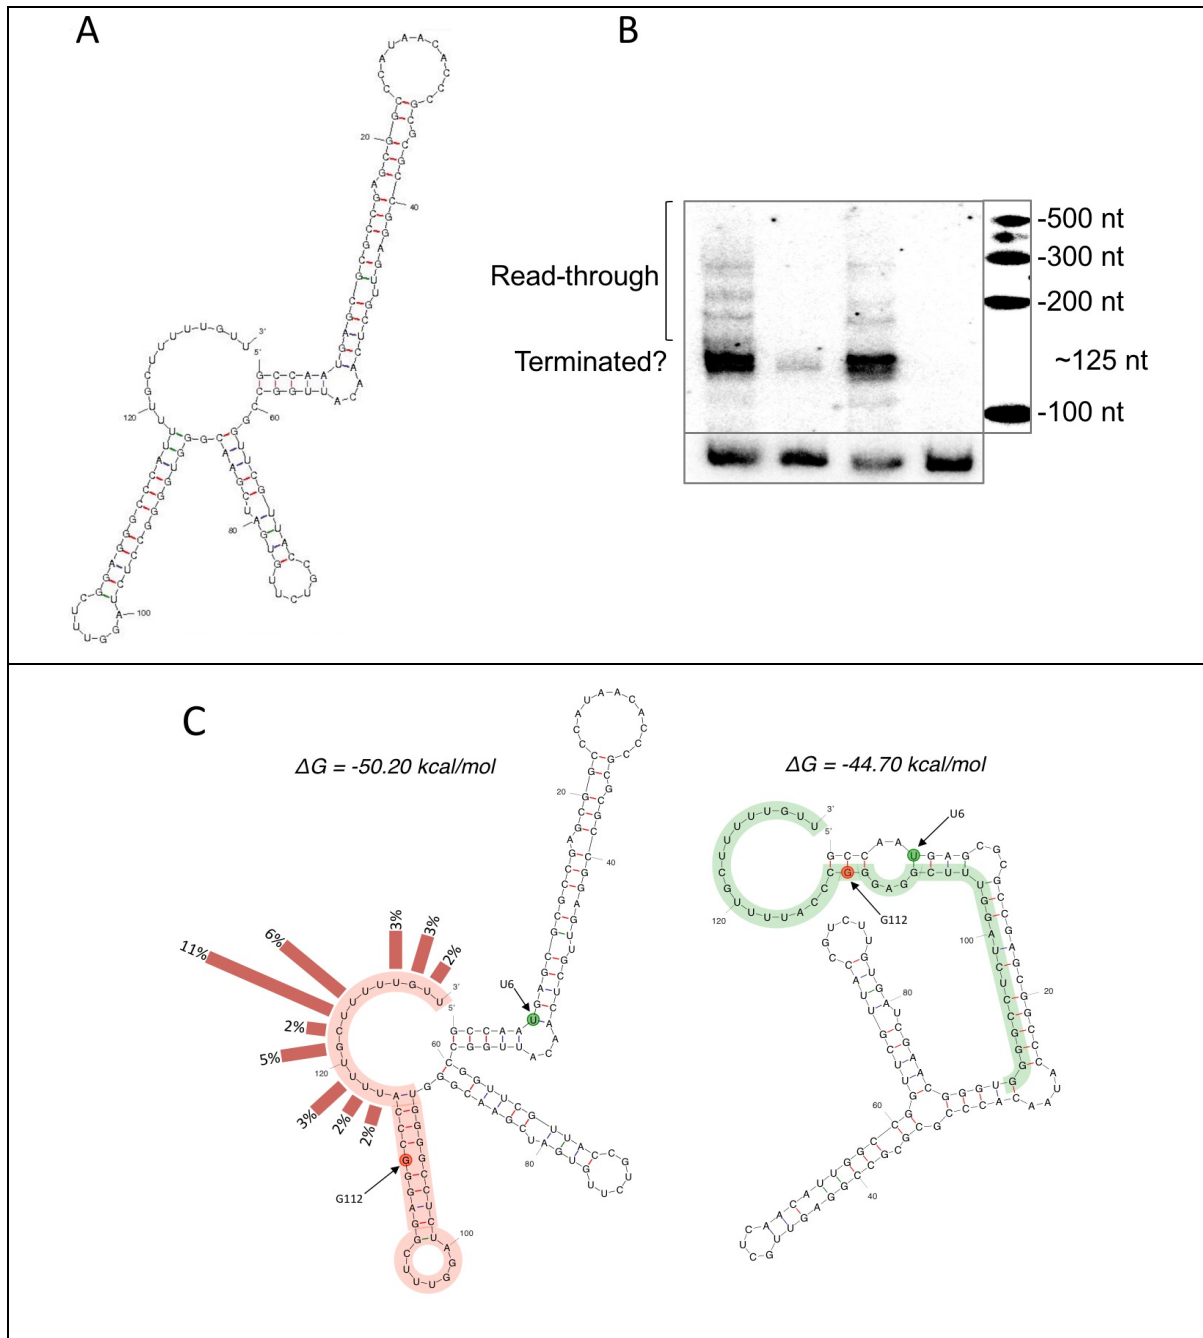

685

Fig. 3

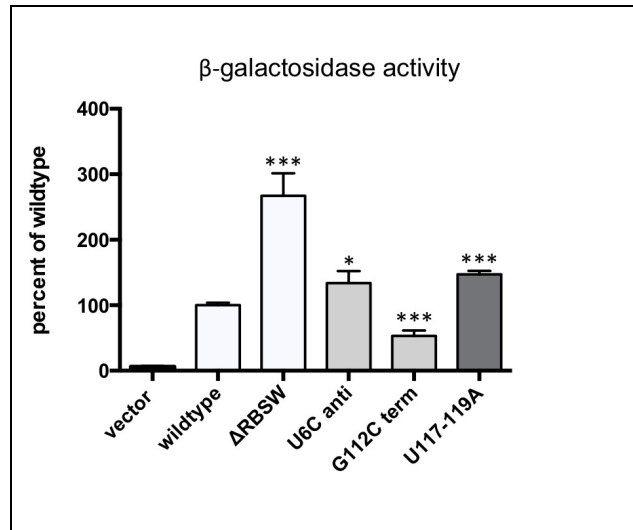

686

Fig. 4

687

688

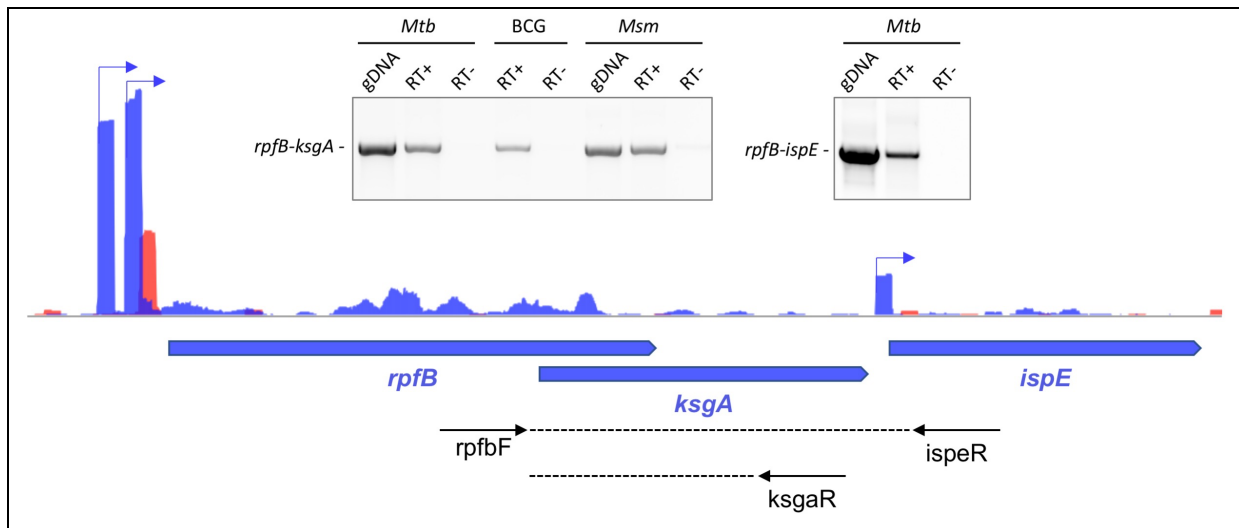

689

Fig. 5



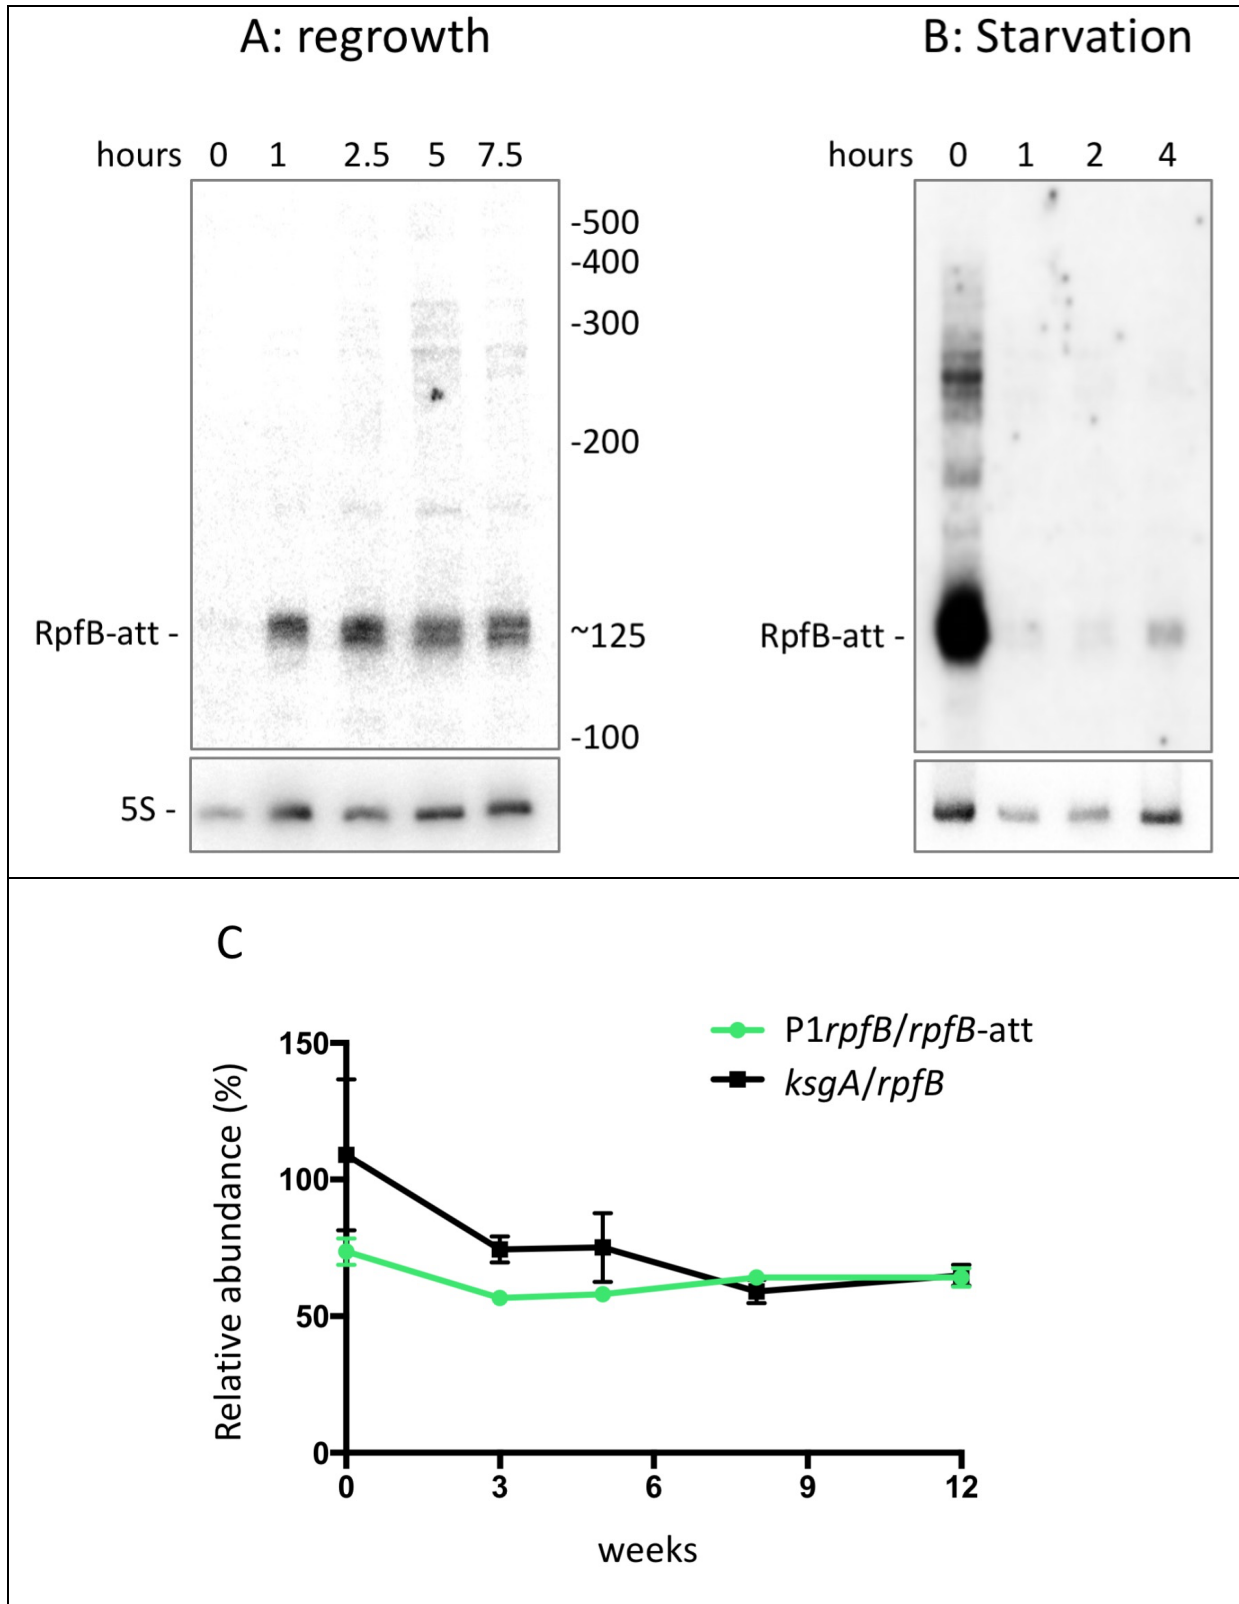

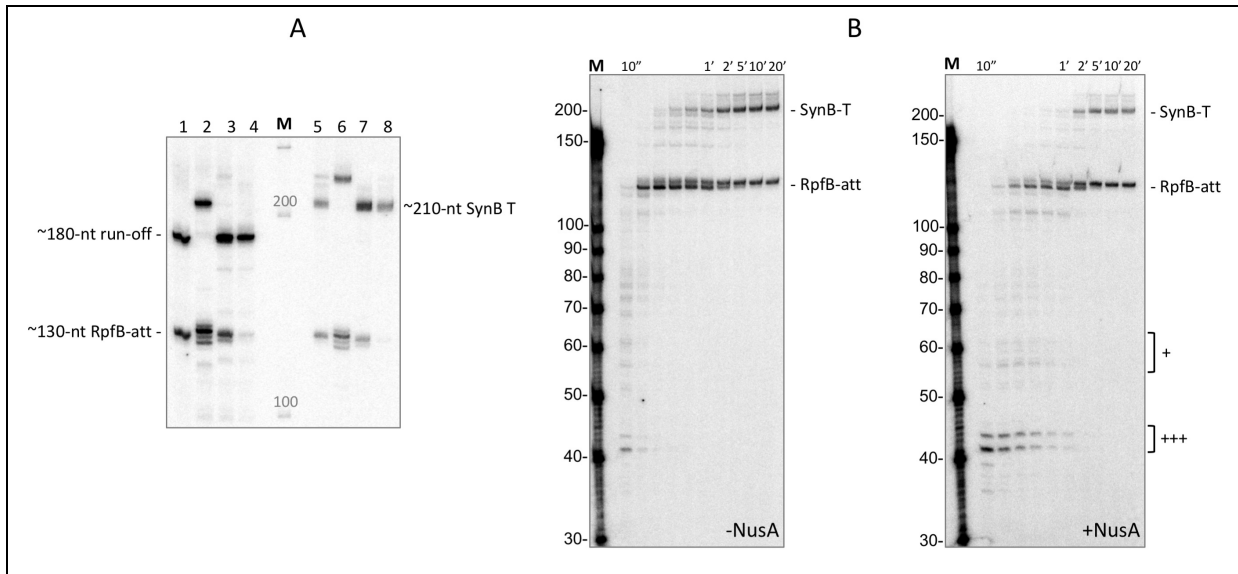

691 Fig. 7

692

693

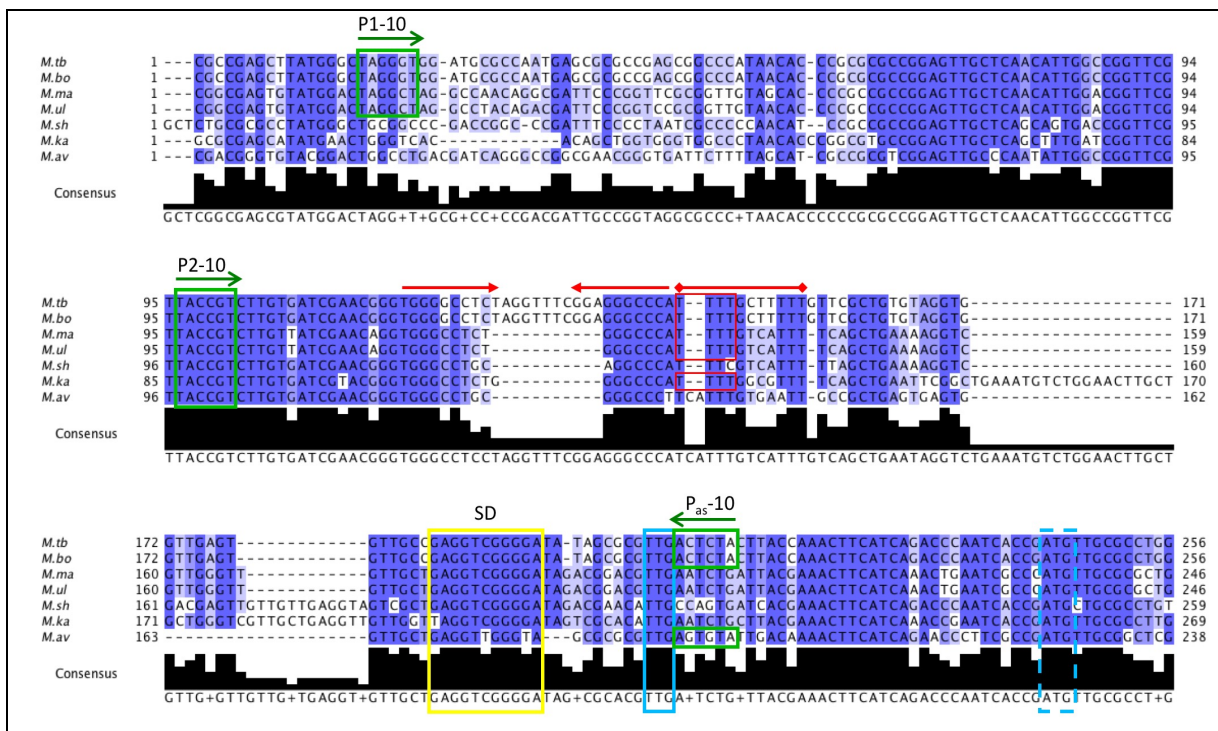

694 Fig. 8

695

696

697
